# Supplementary material for: Differences and Similarities in Diabetes Research between China and the USA
Source: MDPI journal article supplement (doi:10.3390/ijerph16162989), 2019-08-20
Supplement: s1 [file s1]

## **Appendix1: Protocol -comparison of diabetes studies in China and USA Scoping review Protocol**

### ***Study inclusion criteria***

Eligible studies should meet all of the following inclusion criteria:

- Primary research studies or secondary analyses of routinely collected data or existing research datasets
- Studies on diabetes (such as causes, risk factors, prognosis, prevention, diagnosis, treatment, epidemiology, and so on)
- Studies conducted in mainland China or USA
- Studies published in 2010 and 2015, in journals and with abstracts.

We excluded literature review based articles, editorials, letters, and study protocols.

### ***Study search and selection***

We will search PubMed to identify relevant studies conducted in mainland China and USA, and published in 2010 and 2015, using the search strategy below:

China[Affiliation] AND diabetes[mh] NOT (systematic review[Title] OR meta-analysis[Title] OR "REVIEW"[ptyp] OR editorial[ptyp] OR comment[ptyp] OR letter[ptyp] OR protocol[Title])) AND hasabstract[text] AND "Journal Article"[ptyp] AND ("2010/01/01"[Date - Publication] : "2015/12/31"[Date - Publication])

(US[Affiliation] OR USA[Affiliation] OR United States[Affiliation] OR Alabama[Affiliation] OR Alaska[Affiliation] OR Arizona[Affiliation] OR Arkansas[Affiliation] OR California[Affiliation] OR Colorado[Affiliation] OR Connecticut[Affiliation] OR Delaware[Affiliation] OR Florida[Affiliation] OR Georgia[Affiliation] OR Hawaii[Affiliation] OR Idaho[Affiliation] OR Illinois[Affiliation] OR Indiana[Affiliation] OR Iowa[Affiliation] OR Kansas[Affiliation] OR Kentucky[Affiliation] OR Louisiana[Affiliation] OR Maine[Affiliation] OR Maryland[Affiliation] OR Massachusetts[Affiliation] OR Michigan[Affiliation] OR Minnesota[Affiliation] OR Mississippi[Affiliation] OR Missouri[Affiliation] OR Montana[Affiliation] OR Nebraska[Affiliation] OR Nevada[Affiliation] OR "New Hampshire"[Affiliation] OR "New jersey"[Affiliation] OR "New mexico"[Affiliation] OR "New York"[Affiliation] OR "North Carolina"[Affiliation] OR "North Dakota"[Affiliation] OR Ohio[Affiliation] OR Oklahoma[Affiliation] OR Oregon[Affiliation] OR Pennsylvania[Affiliation] OR "Rhode island"[Affiliation] OR "South Carolina"[Affiliation] OR "South Dakota"[Affiliation] OR Tennessee[Affiliation] OR Texas[Affiliation] OR Utah[Affiliation] OR Vermont[Affiliation] OR Virginia[Affiliation] OR Washington[Affiliation] OR West Virginia[Affiliation] OR Wisconsin[Affiliation] OR Wyoming[Affiliation]) AND diabetes[mh] NOT (systematic

review[Title] OR meta-analysis[Title] OR "REVIEW"[ptyp] OR editorial[ptyp] OR comment[ptyp] OR letter[ptyp] OR protocol[Title]) AND hasabstract[text] AND "Journal Article"[ptyp] AND ("2010/01/01"[Date - Publication] : "2015/12/31"[Date - Publication])

We will randomly select a total of 800 studies from records identified by search PubMed:

|       | China | USA |
|-------|-------|-----|
| 2010  | 200   | 200 |
| 2015  | 200   | 200 |
| Total | 400   | 400 |

### ***Data extraction and analysis***

We will extract data based on information available from titles and abstracts of included studies into an Excel sheet. Appendix 2 shows data extraction and coding methods. Data extracted will include: author, year of publication, country, language, study design, participants/subjects, relevance, risk factors investigated, and type of interventions.

Data extraction of the first 20 studies will be conducted independently by two reviewers (FH, SB or FS). We will then compare data extracted, and discuss any disagreements. The data extraction sheet will be revised according to results of the pilot testing. If necessary, we will test the revised data extraction and coding methods using 20 more studies, until the agreement between reviewers is satisfactory. One reviewer will extract and a second reviewer will check data from remaining studies.

### **Data extraction and coding (based on titles/abstracts)**

Note to Appendix 1: (1) Study design coding is based on: Grimes and Schulz. An overview of clinical research: the lay of the land. Lancet 2002, 359: 57-61.

| Heading                         | Coding               | Details                                                                                                                 |
|---------------------------------|----------------------|-------------------------------------------------------------------------------------------------------------------------|
| Endnote number                  | #                    |                                                                                                                         |
| Include                         | Yes                  | Initially selected studies may be excluded according to inclusion/exclusion criteria                                    |
|                                 | No                   |                                                                                                                         |
| First author name               |                      |                                                                                                                         |
| Year of publication             |                      |                                                                                                                         |
| Journal                         | Journal name         |                                                                                                                         |
| Country                         | China                | In which data collection or experiments were conducted                                                                  |
|                                 | USA                  |                                                                                                                         |
| Authors from multiple countries | No                   |                                                                                                                         |
|                                 | Yes                  | If Yes, list the name of other countries                                                                                |
| Language                        | English              |                                                                                                                         |
|                                 | Chinese              |                                                                                                                         |
|                                 | Other: _____         |                                                                                                                         |
| Data source                     | Primary              | Primary data collected, including multiple publications of the same study                                               |
|                                 | Secondary            | Used existing datasets, including routinely collected data or existing research datasets.                               |
| Design <sup>(1)</sup>           | Laboratory-based     | Animal studies; and studies based on tissues, cells, and other bio-samples, without human participants involved.        |
|                                 | Clinical trial -RCT  | Experimental study -Randomised controlled trials that evaluated effects or adverse effects of healthcare interventions. |
|                                 | Clinical trial -NRS  | Experimental study -Non-randomised clinical trials; including historically controlled trials                            |
|                                 | Case series          | Retrospective, observational case reports, sample size was usually small (n<100)                                        |
|                                 | Cohort-prospective   | Prospective observational studies with comparison group: Exposure -> Outcome                                            |
|                                 | Cohort-retrospective | Retrospective observational studies with comparison group (n>=100)                                                      |
|                                 | Case Control         | Observational studies with comparison group: Outcome -> Exposure                                                        |
|                                 | Cross sectional      | Observational studies: Exposure & Outcome at the same time                                                              |
|                                 | Other                | Please specify                                                                                                          |
| Subjects                        | Animal               | Please specify species                                                                                                  |
|                                 | Bio-sample           | E.g, human tissues, cancer cells, blood samples                                                                         |
|                                 | Patients             | People with clinically diagnosed conditions                                                                             |
|                                 | Population           | General population in communities                                                                                       |
|                                 | Care providers       | E.g., nurses, physicians, decision makers                                                                               |
|                                 | Other                | Please specify. E.g., air, water, and other environmental samples                                                       |
| NCD category                    | Diabetes             | Types: Type I, Type II, Pre-diabetic                                                                                    |
|                                 | Multiple             | Diabetes and other conditions                                                                                           |
|                                 |                      |                                                                                                                         |
| Relevance                       | Disease risk factors | Risk factors that were associated with diabetes                                                                         |
|                                 | Prognosis            |                                                                                                                         |
|                                 | Diagnosis            | Including screening, and monitoring of conditions                                                                       |
|                                 | Treatment            |                                                                                                                         |
|                                 | Prevention           |                                                                                                                         |
|                                 | Epidemiology         | E.g., disease distribution, trends                                                                                      |

| Heading       | Coding                  | Details                                                                                 |
|---------------|-------------------------|-----------------------------------------------------------------------------------------|
|               | Consequence             | For example, impact of diabetes on cost, economics                                      |
|               | Multiple                | List relevant items                                                                     |
|               | Other                   | Please specify; Including diabetes as a risk factor for other diseases (such as stroke) |
| Risk factors  | Tobacco                 |                                                                                         |
|               | Alcohol                 |                                                                                         |
|               | Inactivity              |                                                                                         |
|               | Dietary                 |                                                                                         |
|               | Body weight             |                                                                                         |
|               | Blood pressure          |                                                                                         |
|               | Biomarker               | Details: such as cholesterol, blood sugar, etc.                                         |
|               | Genetic                 |                                                                                         |
|               | Medical                 | Adverse effects of medications or other treatments                                      |
|               | Environmental           | Natural factors, e.g., air, water, climate                                              |
|               | Demographic             | E.g, age, sex, ethnicity                                                                |
|               | Socioeconomic           | Social, economic factors                                                                |
|               | Multiple                | List multiple factors                                                                   |
|               | Other                   | Please specify                                                                          |
|               | NA                      | Not applicable                                                                          |
| Interventions | Diagnostic tests        |                                                                                         |
|               | Pharmacological         |                                                                                         |
|               | Radiological            |                                                                                         |
|               | Surgical                |                                                                                         |
|               | Biological              | e.g, cell therapy, biological products                                                  |
|               | Educational/counselling |                                                                                         |
|               | Behavioural             |                                                                                         |
|               | Disease management      | E.g, implementation of guidelines, care pathways.                                       |
|               | Public health policy    | e.g. ban smoking in public places                                                       |
|               | Alternative/traditional | Specify when possible                                                                   |
|               | Other:                  | Please specify                                                                          |
|               | NA                      | Not applicable                                                                          |
|               |                         |                                                                                         |

### ***Data analysis methods***

The main study characteristics of the included will be descriptively summarised in tables.

Differences in study characteristics between China and USA will be compared, and statistically tested using Chi-square test. Statistical significance was defined as  $P < 0.05$ .
